# Supplementary material for: Glucagon-like peptide-1 analog liraglutide leads to multiple metabolic alterations in diet-induced obese mice
Source: PubMed Central journal article supplement — J Biol Chem. 2022 Nov 7;298(12):102682. doi: 10.1016/j.jbc.2022.102682 (PMC9730228; doi:10.1016/j.jbc.2022.102682), 2022-11-07
Supplement: mmc1.pdf [file mmc1.pdf]

## **Supporting Information**

### **Glucagon-like peptide-1 analog liraglutide leads to multiple metabolic alterations in diet-induced obese mice**

Seokjae Park<sup>1,2</sup>, Sungjoon Oh<sup>1,2</sup> and Eun-Kyoung Kim<sup>1,2\*</sup>

This PDF file includes:  
Supplementary Figures 1-6

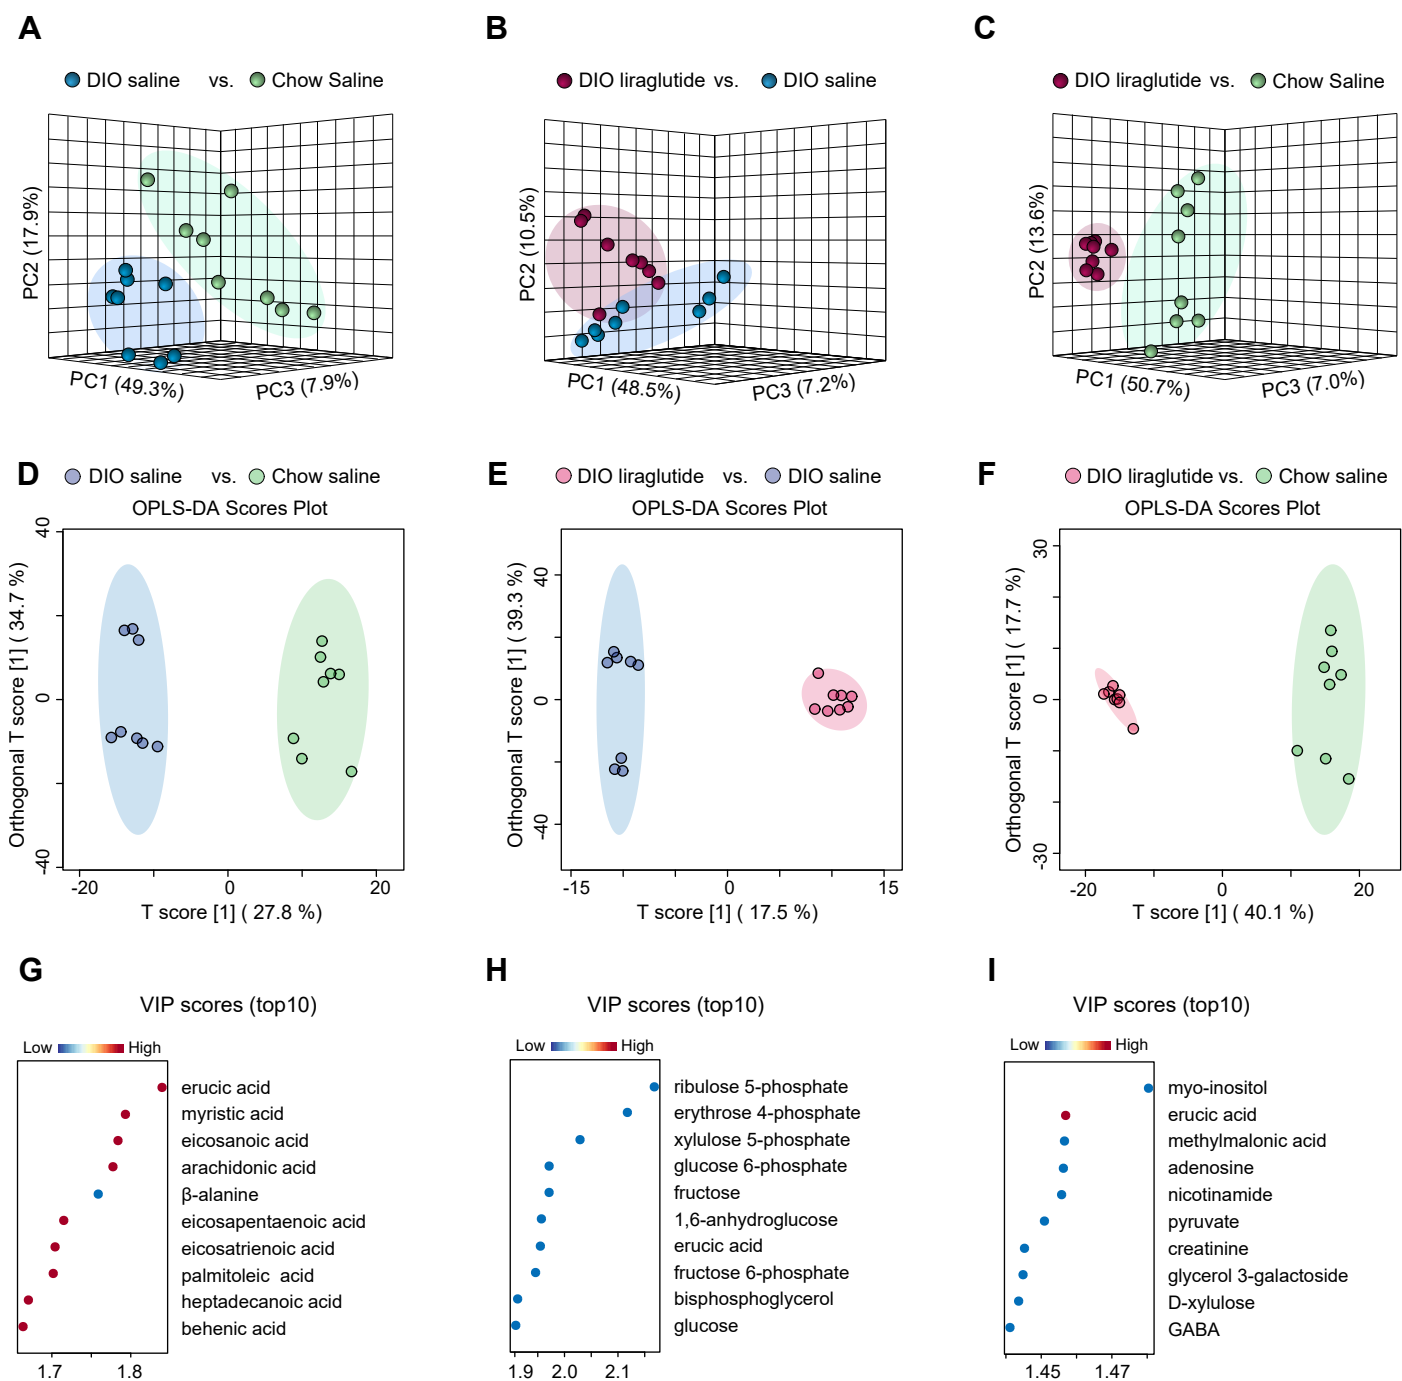

**Figure S1. Comparative metabolite analysis between the groups**

*A–C*, Principal component analysis (PCA) plots for (*A*) DIO saline vs. Chow saline, (*B*) DIO liraglutide vs. DIO saline, and (*C*) DIO liraglutide vs. Chow saline. *D–F*, Orthogonal partial least squares discriminant analysis (OPLS-DA) scores plots for (*D*) DIO saline vs. Chow saline, (*E*) DIO liraglutide vs. DIO saline, and (*F*) DIO liraglutide vs. Chow saline. *G–I*, Variable influence on projection (VIP) scores plots (top 10) for (*G*) DIO saline vs. Chow saline, (*H*) DIO liraglutide vs. DIO saline, and (*I*) DIO liraglutide vs. Chow saline. In *G–I*, colors show the number of tissue-specific metabolites up- or down-regulated in the volcano plot in Figure 2D.

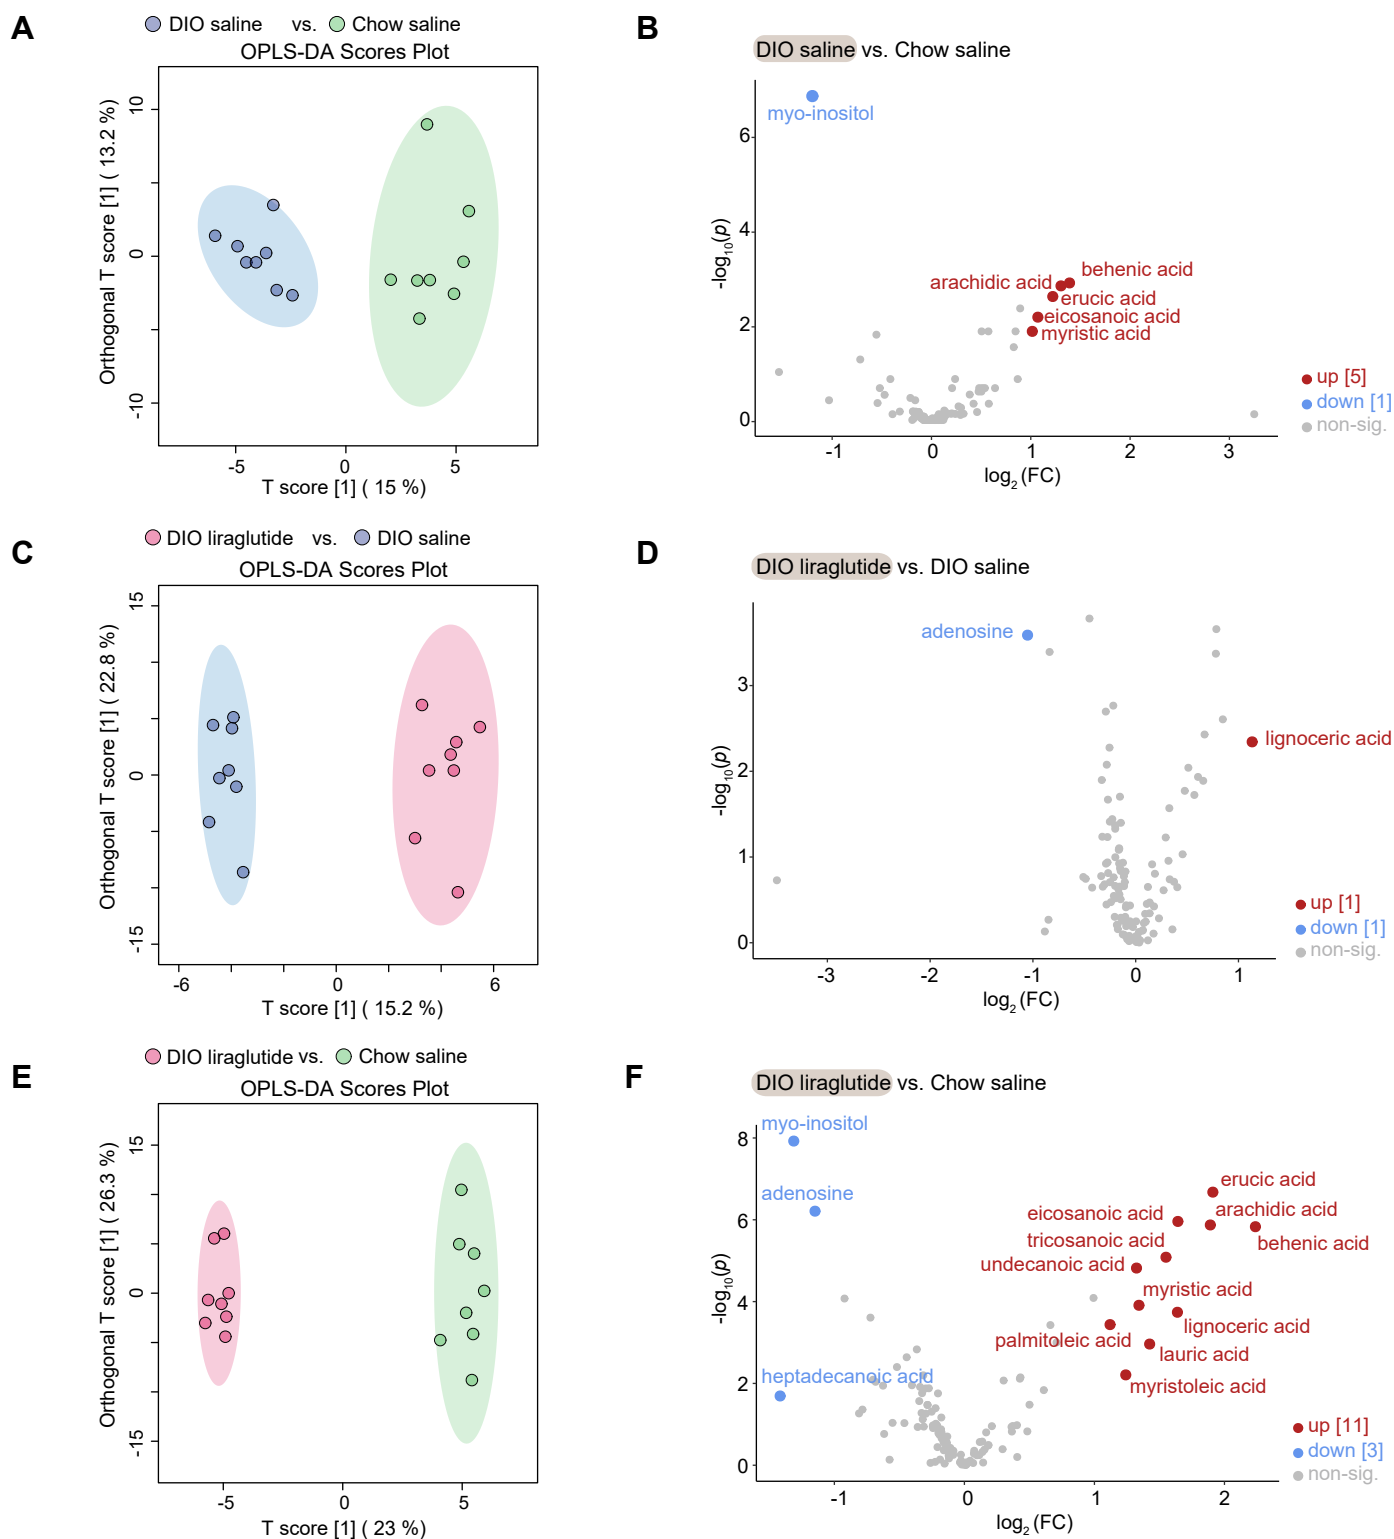

**Figure S2. OPLS-DA and volcano plots for the hypothalamus**

**A, C, E**, OPLS-DA scores plots for (**A**) DIO saline vs. Chow saline, (**C**) DIO liraglutide vs. DIO saline, and (**E**) DIO liraglutide vs. Chow saline. **B, D, F**, Volcano plots for (**B**) DIO saline vs. Chow saline, (**D**) DIO liraglutide vs. DIO saline, and (**F**) DIO liraglutide vs. Chow saline. In **B, D, F**, non-significant metabolites are shown in grey.

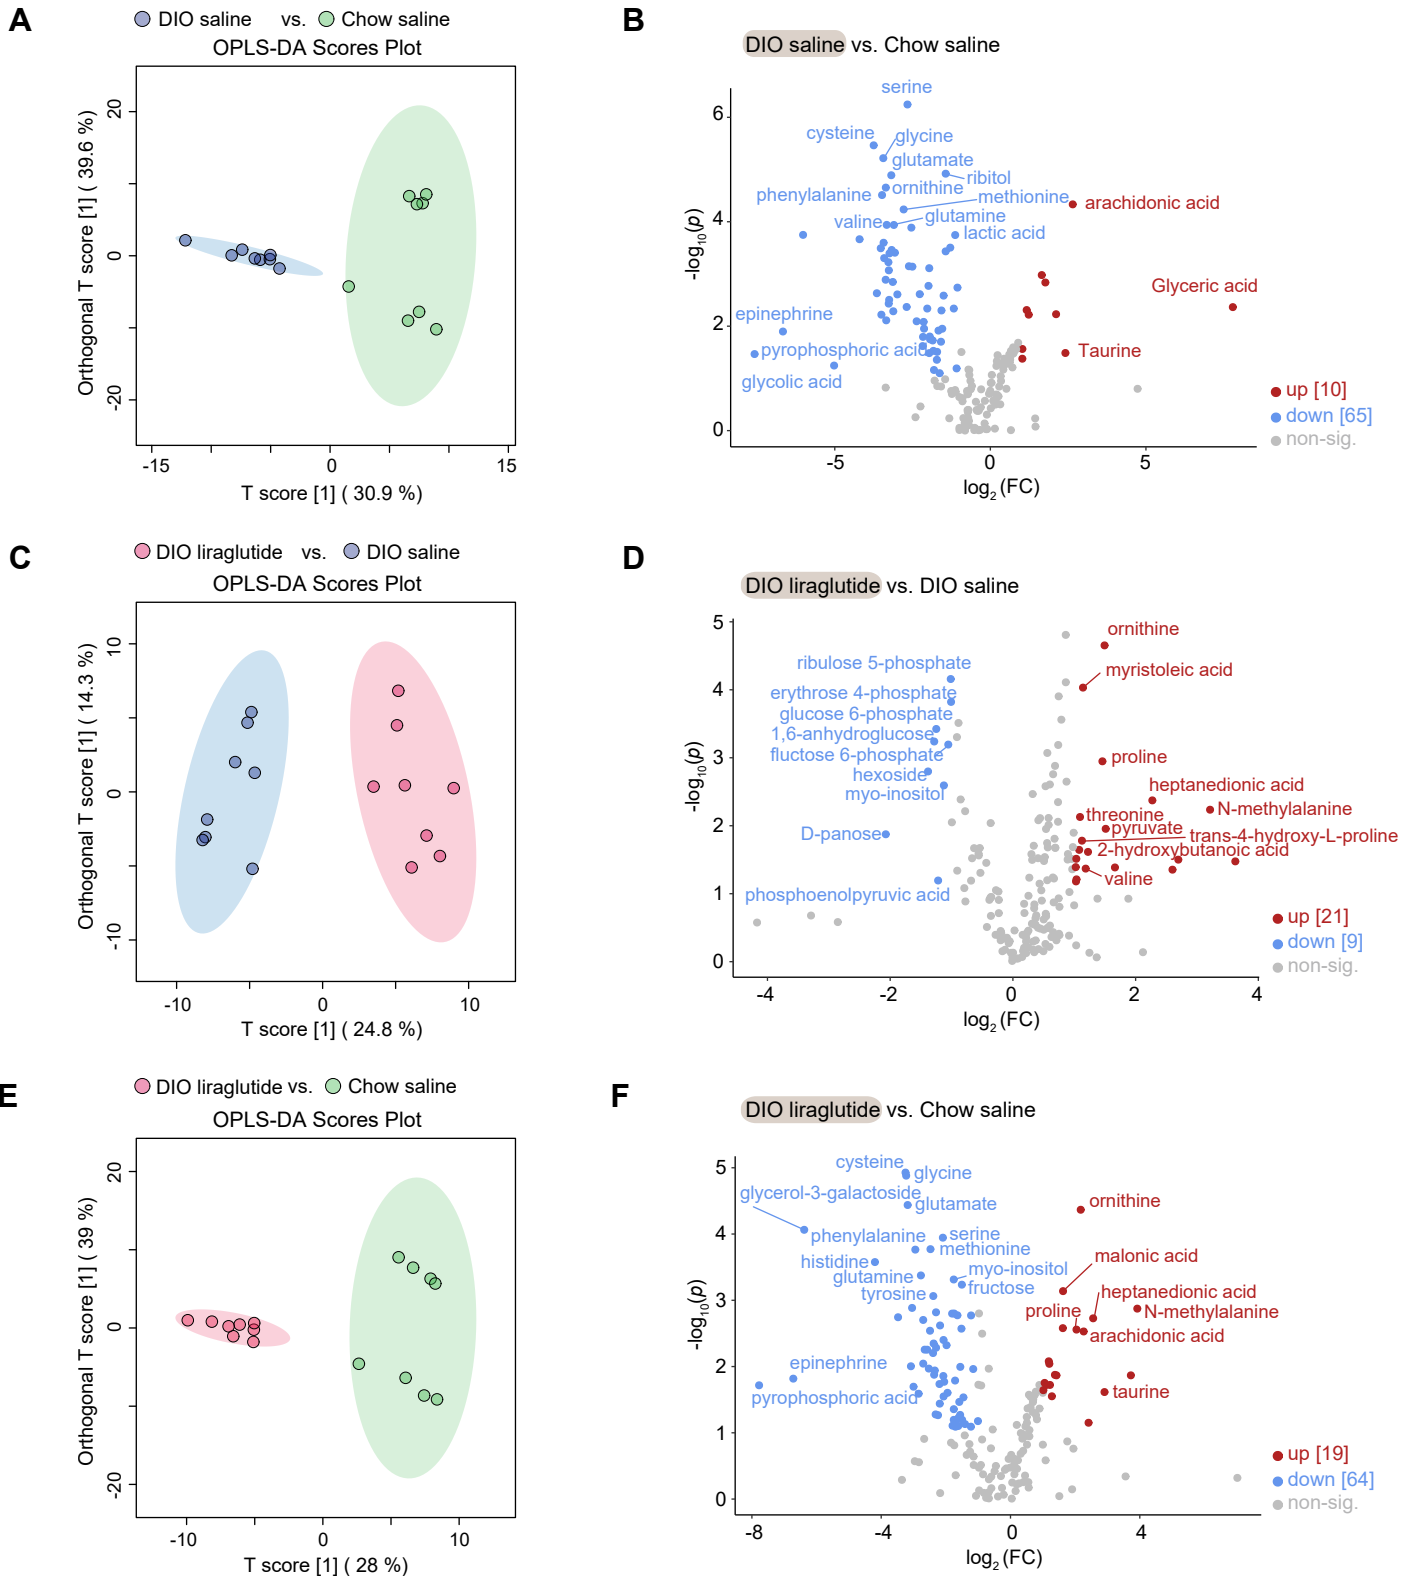

**Figure S3. OPLS-DA and volcano plots for the plasma**

**A, C, E**, OPLS-DA scores plots for **(A)** DIO saline vs. Chow saline, **(C)** DIO liraglutide vs. DIO saline, and **(E)** DIO liraglutide vs. Chow saline. **B, D, F**, Volcano plots for **(B)** DIO saline vs. Chow saline, **(D)** DIO liraglutide vs. DIO saline, and **(F)** DIO liraglutide vs. Chow saline. In **B, D, F**, non-significant metabolites are shown in gray.

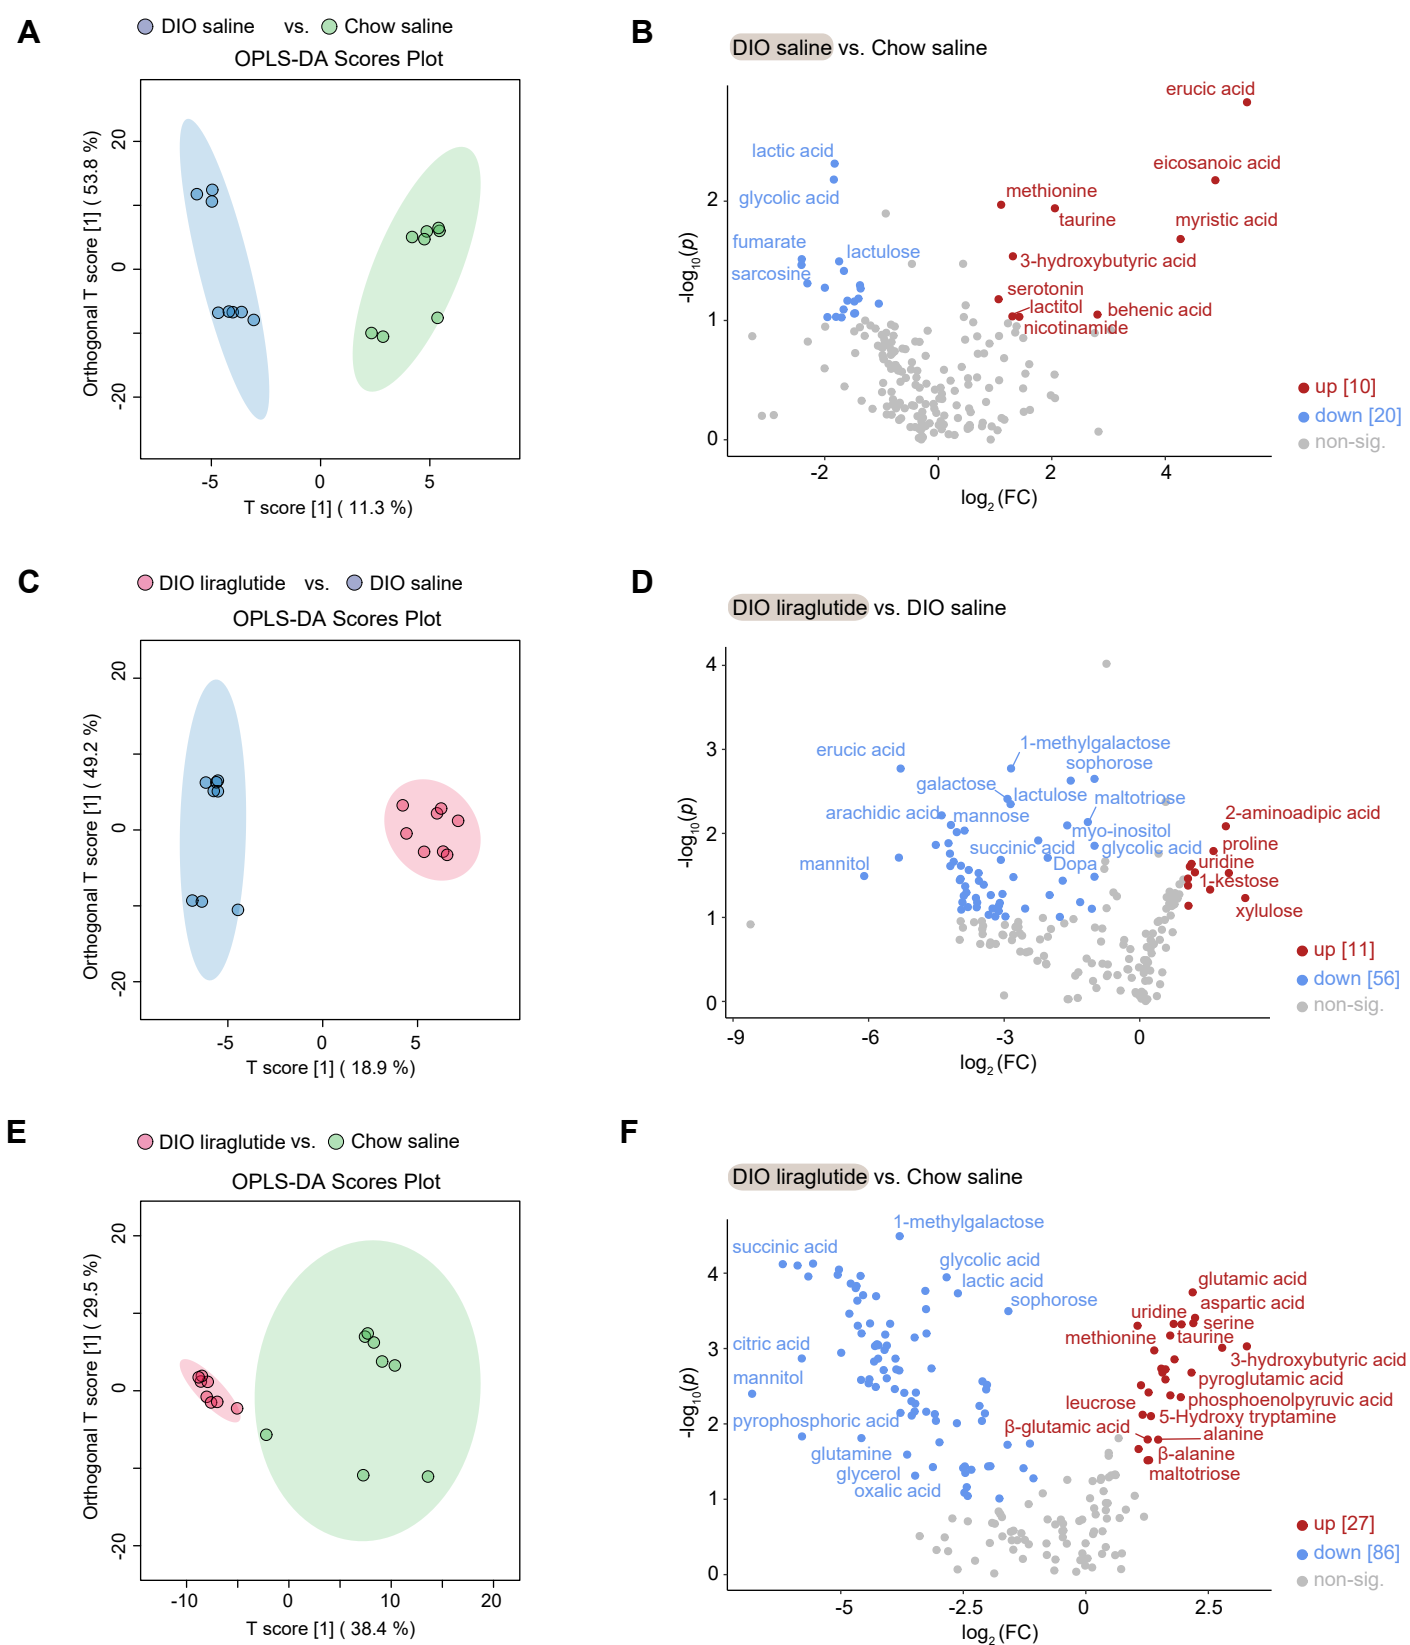

**Figure S4. OPLS-DA and volcano plots for the liver**

**A, C, E**, OPLS-DA scores plots for **(A)** DIO saline vs. Chow saline, **(C)** DIO liraglutide vs. DIO saline, and **(E)** DIO liraglutide vs. Chow saline. **B, D, F**, Volcano plots for **(B)** DIO saline vs. Chow saline, **(D)** DIO liraglutide vs. DIO saline, and **(F)** DIO liraglutide vs. Chow saline. In **B, D, F**, non-significant metabolites are shown in gray.

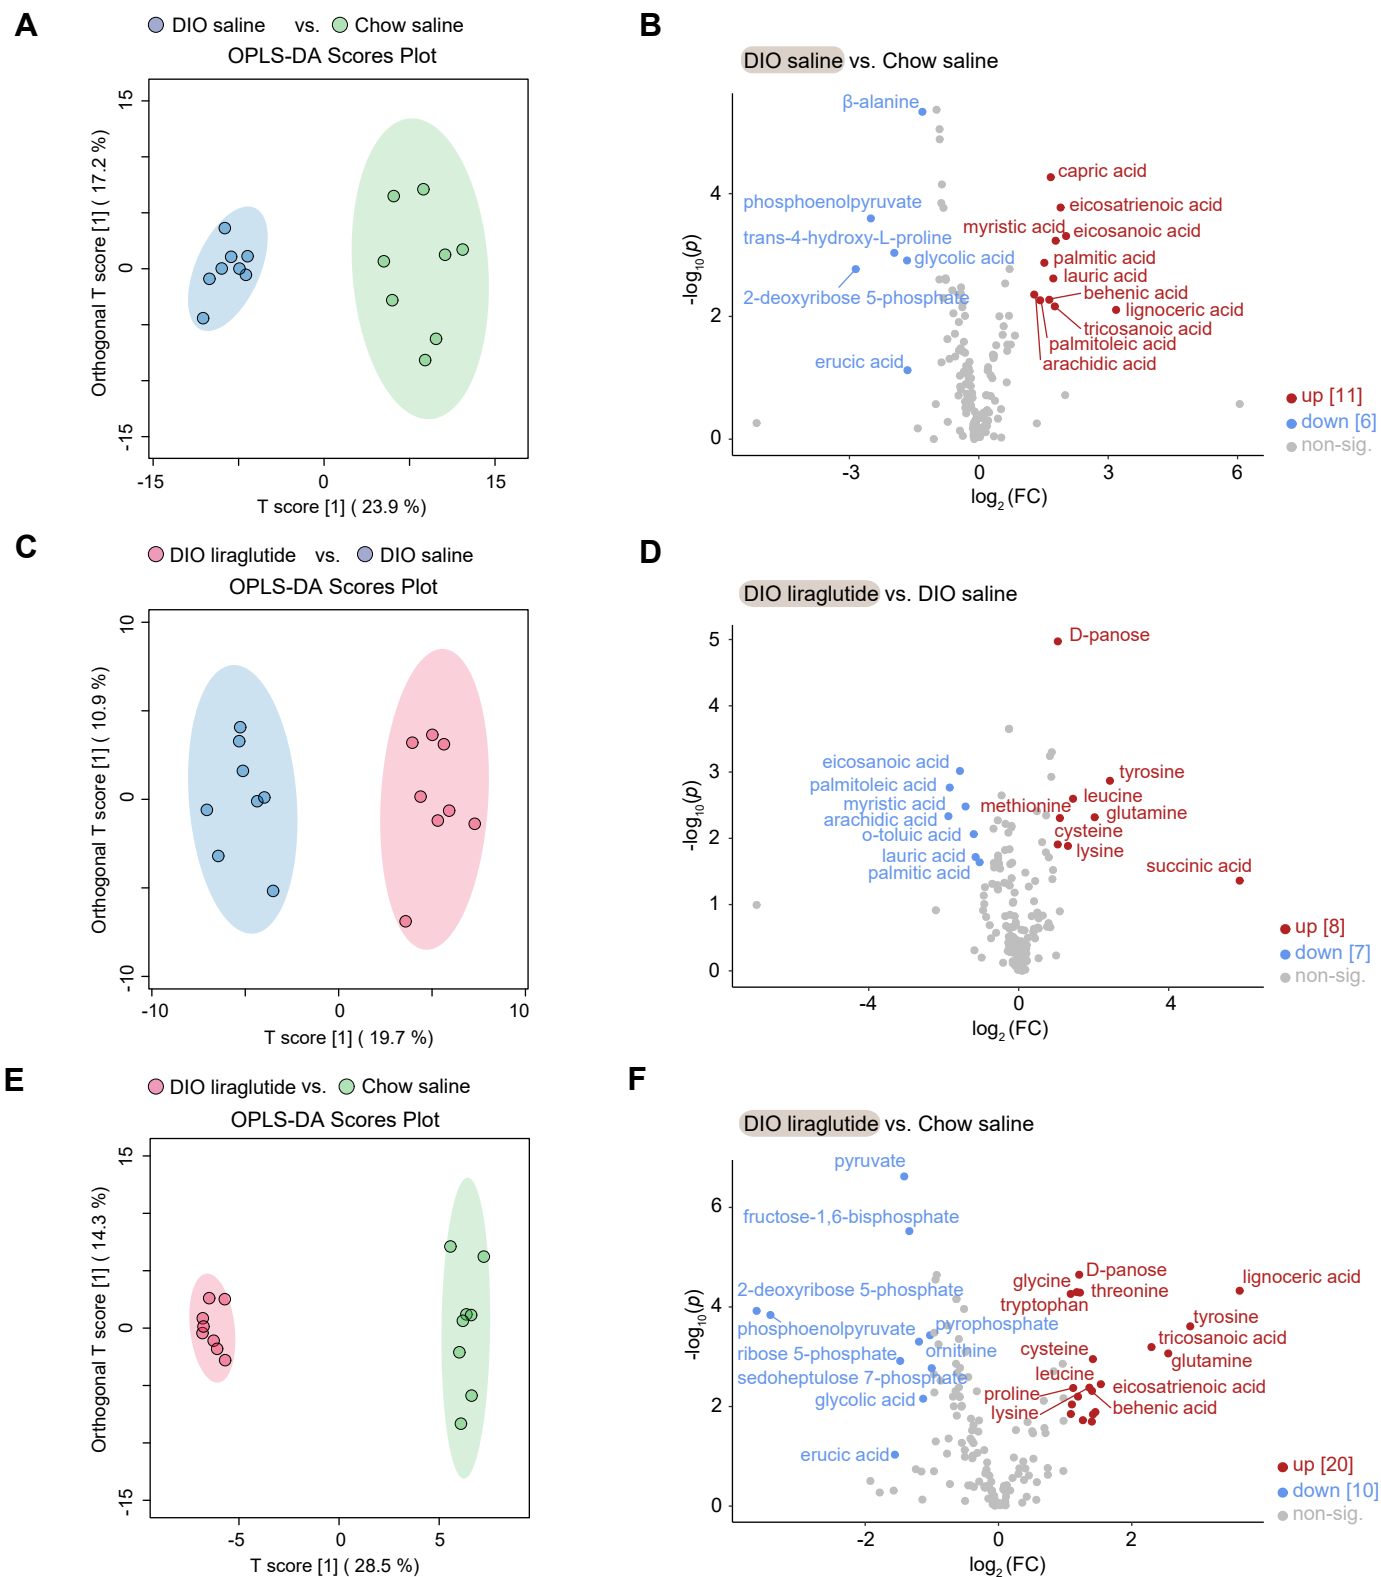

**Figure S5. OPLS-DA and volcano plots for the skeletal muscle**

**A, C, E**, OPLS-DA scores plots for (**A**) DIO saline vs. Chow saline, (**C**) DIO liraglutide vs. DIO saline, and (**E**) DIO liraglutide vs. Chow saline. **B, D, F**, Volcano plots for (**B**) DIO saline vs. Chow saline, (**D**) DIO liraglutide vs. DIO saline, and (**F**) DIO liraglutide vs. Chow saline. In **B, D, F**, non-significant metabolites are shown in grey.

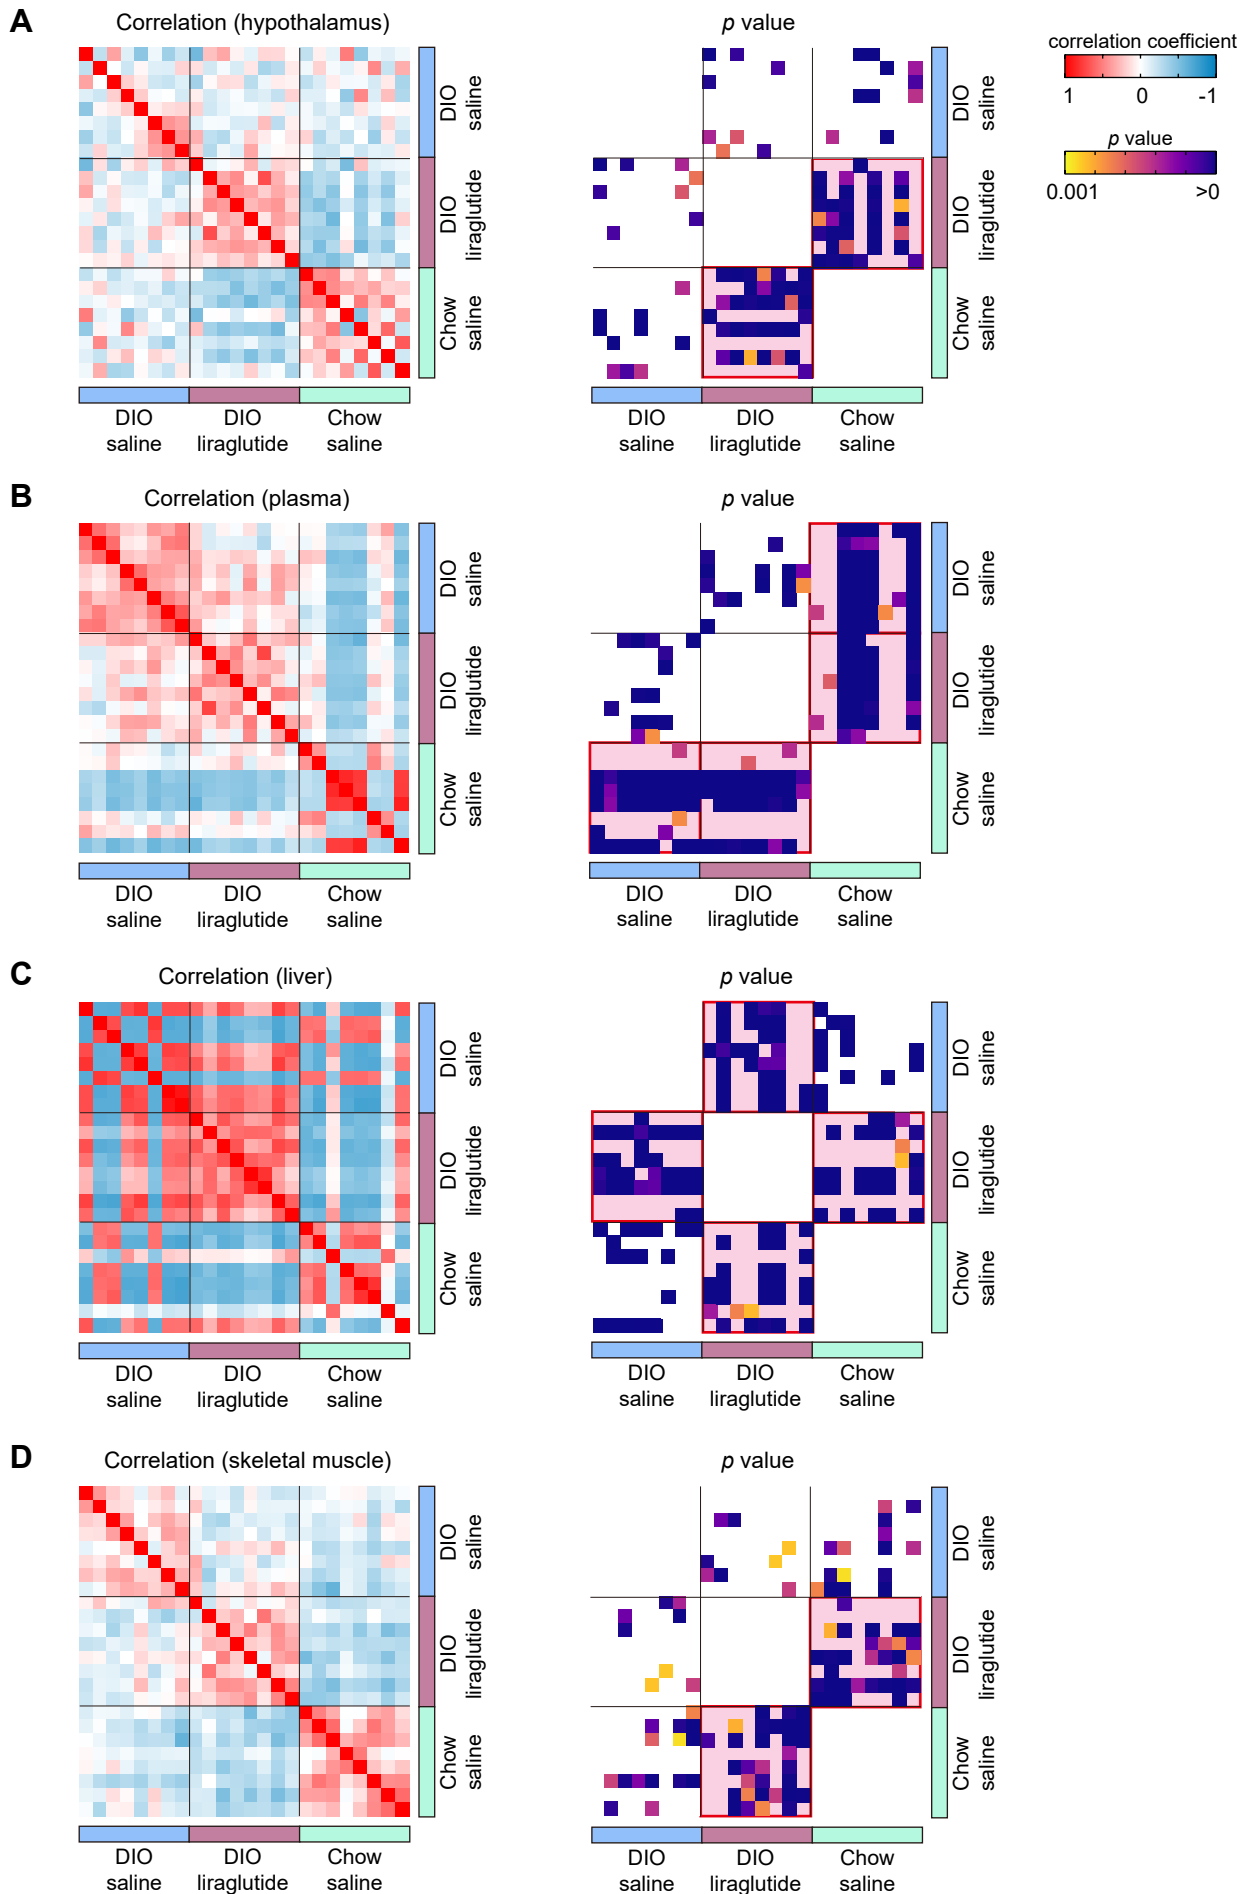

**Figure S6. Tissue-specific correlations among the three groups**

Correlations plots based on Pearson's correlation coefficients analysis: **A**, hypothalamus; **B**, plasma; **C**, liver; and **D**, skeletal muscle.
